# Supplementary material for: Models and Impacts of Science Research Experiences: A Review of the Literature of CUREs, UREs, and TREs
Source: PubMed Central journal article supplement — CBE Life Sci Educ. 2019 Winter;18(4):ar65. doi: 10.1187/cbe.19-03-0069 (PMC6889846; doi:10.1187/cbe.19-03-0069), 2019
Supplement: cbe-18-ar65-s001.pdf [file cbe-18-ar65-s001.pdf]

# Supplemental Material

*CBE—Life Sciences Education*

Krim *et al.*

CURE papers:

- [1] Al-Maktoumi, A., Al-Ismaïly, S., & Kacimov, A. (2016). Research-based learning for undergraduate students in soil and water sciences: a case study of hydopedology in an arid-zone environment. *Journal of Geography in Higher Education*, 1-19.
- [2] Alkaher, I., Dolan, E. L. (2014). Integrating research into undergraduate courses: Current practices and future directions. In Sunal, D., Sunal, C. & Wright, E., Mason, C., and Zollman, D. (Eds.), *Research based undergraduate science teaching*. Charlotte, NC: Information Age.
- [3] Beckmann, E. A., Estavillo, G. M., Mathesius, U., Djordjevic, M. A., & Nicotra, A. B. (2015). The plant detectives: innovative undergraduate teaching to inspire the next generation of plant biologists. *Frontiers in plant science*, 6.
- [4] Boltax, A. L., Armanious, S., Kosinski - Collins, M. S., & Pontrello, J. K. (2015). Connecting biology and organic chemistry introductory laboratory courses through a collaborative research project. *Biochemistry and Molecular Biology Education*, 43(4), 233-244.
- [5] Bowlick, F. J., Bednarz, S. W., & Goldberg, D. W. (2016). Student Learning in an Introductory GIS Course: Using a Project - Based Approach. *Transactions in GIS*, 20(2), 182-202.
- [6] Bowling, B. V., Schultheis, P. J., & Strome, E. D. (2016). Implementation and assessment of a yeast orphan gene research project: involving undergraduates in authentic research experiences and progressing our understanding of uncharacterized open reading frames. *Yeast*, 33(2), 43-53.
- [7] Boyd-Kimball, D., & Miller, K. R. (2017). From Cookbook to Research: Redesigning an Advanced Biochemistry Laboratory. *Journal of Chemical Education*, 95(1), 62-67.
- [8] Brannstrom, C., & Houser, C. (2015). "Riding the rip": an experiential and integrated human-physical geography curriculum in Costa Rica. *Journal of Geography in Higher Education*, 39(4), 527-542.
- [9] Brittle, S. W., Baker, J. D., Dorney, K. M., Dagher, J. M., Ebrahimian, T., Higgins, S. R., & Pavel Sizemore, I. E. (2015). Measuring the Silver Composition of Nanocolloids by Inductively Coupled Plasma-Optical Emission Spectroscopy: A Laboratory Experiment for Chemistry and Engineering Students. *Journal of Chemical Education*, 92(6), 1061-1065.
- [10] Brown, J. A. (2016). Evaluating the effectiveness of a practical inquiry - based learning bioinformatics module on undergraduate student engagement and applied skills. *Biochemistry and Molecular Biology Education*, 44(3), 304-313.
- [11] Brownell, S. E., Hekmat-Safe, D. S., Singla, V., Seawell, P. C., Imam, J. F. C., Eddy, S. L., ... & Cyert, M. S. (2015). A high-enrollment course-based undergraduate research experience

improves student conceptions of scientific thinking and ability to interpret data. *CBE-Life Sciences Education*, 14(2), ar21.

[12] Campbell, A. M., Eckdahl, T., Cronk, B., Andresen, C., Frederick, P., Huckuntod, S., ... & Yuan, J. (2014). pClone: synthetic biology tool makes promoter research accessible to beginning biology students. *CBE-Life Sciences Education*, 13(2), 285-296.

[13] Chase, A. M., Clancy, H. A., Lachance, R. P., Mathison, B. M., Chiu, M. M., & Weaver, G. C. (2017). Improving critical thinking via authenticity: the CASPiE research experience in a military academy chemistry course. *Chemistry Education Research and Practice*, 18(1), 55-63.

[14] Chatfield, C. (2014). A multi-unit project for building scientific confidence via authentic research in identification of environmental bacterial isolates. *Journal of microbiology & biology education*, 15(2), 325.

[15] Clark, T. M., Ricciardo, R., & Weaver, T. (2015). Transitioning from Expository Laboratory Experiments to Course-Based Undergraduate Research in General Chemistry. *Journal of Chemical Education*, 93(1), 56-63.

[16] Coles, S. J., & Mapp, L. K. (2015). Conducting Reflective, Hands-On Research with Advanced Characterization Instruments: A High-Level Undergraduate Practical Exploring Solid-State Polymorphism. *Journal of Chemical Education*, 93(1), 131-140.

[17] Colthorpe, K., Abraha, H. M., Zimbardi, K., Ainscough, L., Spiers, J. G., Chen, H. J. C., & Lavidis, N. A. (2017). Assessing students' ability to critically evaluate evidence in an inquiry-based undergraduate laboratory course. *Advances in Physiology Education*, 41(1), 154-162.

[18] Elgin, S. C., & Shaffer, C. D. (2014). A broadly implementable research course in phage discovery and genomics for first-year undergraduate students.

[19] Evans, H. G., Heyl, D. L., & Liggitt, P. (2016). Team-Based Learning, Faculty Research, and Grant Writing Bring Significant Learning Experiences to an Undergraduate Biochemistry Laboratory Course. *Journal of Chemical Education*, 93(6), 1027-1033.

[20] Felzien, L. K. (2016). Integration of a zebrafish research project into a molecular biology course to support critical thinking and course content goals. *Biochemistry and Molecular Biology Education*, 44(6), 565-573.

[21] Flaherty, E. A., Walker, S. M., Forrester, J. H., & Ben - David, M. (2017). Effects of course - based undergraduate research experiences (CURE) on wildlife students. *Wildlife Society Bulletin*, 41(4), 701-711.

- [22] Gadhamshetty, V., Shrestha, N., & Kilduff, J. E. (2016). Project-based introduction to an engineering design course incorporating microbial fuel cells as a renewable energy technology. *Journal of Professional Issues in Engineering Education and Practice*, 142(3), 05016001.
- [23] Godin, E. A., Wormington, S. V., Perez, T., Barger, M. M., Snyder, K. E., Richman, L. S., ... & Linnenbrink-Garcia, L. (2015). A Pharmacology-Based Enrichment Program for Undergraduates Promotes Interest in Science. *CBE-Life Sciences Education*, 14(4), ar40.
- [24] Goeden, T. J., Kurtz, M. J., Quitadamo, I. J., & Thomas, C. (2015). Community-based inquiry in allied health biochemistry promotes equity by improving critical thinking for women and showing promise for increasing content gains for ethnic minority students. *Journal of Chemical Education*, 92(5), 788-796.
- [25] Gray, C., Price, C. W., Lee, C. T., Dewald, A. H., Cline, M. A., McAnany, C. E., ... & Mura, C. (2015). Known structure, unknown function: An inquiry - based undergraduate biochemistry laboratory course. *Biochemistry and Molecular Biology Education*, 43(4), 245-262.
- [26] Hanauer, D. I., Graham, M. J., Betancur, L., Bobrownicki, A., Cresawn, S. G., Garlena, R. A., ... & Jacobs, W. R. (2017). An inclusive Research Education Community (iREC): Impact of the SEA-PHAGES program on research outcomes and student learning. *Proceedings of the National Academy of Sciences*, 201718188.
- [27] Hansen, S. J., Zhu, J., Karch, J. M., Sorrento, C. M., Ulichny, J. C., & Kaufman, L. J. (2016). Bridging the Gap between Instructional and Research Laboratories: Teaching Data Analysis Software Skills through the Manipulation of Original Research Data. *Journal of Chemical Education*, 93(4), 663-668.
- [28] Hanson, P. K., & Stultz, L. (2015). Collaboration-focused workshop for interdisciplinary, inter-institutional teams of college science faculty. *Journal of College Science Teaching*, 44(6), 30-37.
- [29] Hartings, M. R., Fox, D. M., Miller, A. E., & Muratore, K. E. (2015). A Hybrid Integrated Laboratory and Inquiry-Based Research Experience: Replacing Traditional Laboratory Instruction with a Sustainable Student-Led Research Project. *Journal of Chemical Education*, 92(6), 1016-1023.
- [30] Harvey, P. A., Wall, C., Luckey, S. W., Langer, S., & Leinwand, L. A. (2014). The python project: a unique model for extending research opportunities to undergraduate students. *CBE—Life Sciences Education*, 13(4), 698-710.
- [31] Hewitt, K. M., Kayes, L. J., Hubert, D., & Chouinard, A. (2014). Investigating Issues in the Laboratory: The Behavior of Red Swamp Crayfish as an Invasive Species. *American Biology Teacher*, 76(9), 609-614

- [32] Hsieh, S. I., Hsu, L. L., & Huang, T. H. (2016). The effect of integrating constructivist and evidence-based practice on baccalaureate nursing student's cognitive load and learning performance in a research course. *Nurse education today*, 42, 1-8.
- [33] Hsu, J. L., Wrona, A. M., Brownell, S. E., & Khalfan, W. (2016). The Explorations Program: Benefits of Single-Session, Research-Focused Classes for Students and Postdoctoral Instructors. *Journal of College Science Teaching*, 45(6), 78.
- [34] Iyer, R., Smith, K., Kudrle, B., & Leon, A. (2015). Detection and location of OP-degrading activity: a model to integrate education and research. *New biotechnology*, 32(4), 403-411.
- [35] Jordan, T. C., Burnett, S. H., Carson, S., Caruso, S. M., Clase, K., DeJong, R. J., ... & Findley, A. M. (2014). A broadly implementable research course in phage discovery and genomics for first-year undergraduate students. *MBio*, 5(1), e01051-13.
- [36] Kappler, U., Rowland, S. L., & Pedwell, R. K. (2017). A unique large - scale undergraduate research experience in molecular systems biology for non - mathematics majors. *Biochemistry and Molecular Biology Education*, 45(3), 235-248.
- [37] Keiler, K. C., Jackson, K. L., Jaworski, L., Lopatto, D., & Ades, S. E. (2017). Teaching broader impacts of science with undergraduate research. *PLoS biology*, 15(3), e2001318.
- [38] Kerr, M. A., & Yan, F. (2016). Incorporating course-based undergraduate research experiences into analytical chemistry laboratory curricula. *Journal of Chemical Education*, 93(4), 658-662.
- [39] Koontz Anthony, A., Walters, L., & McGrady, P. (2017). Creating connections between authentic research and the development of science identities in undergraduate Marine Biology experiences. *Florida Scientist*, 80, 2.
- [40] Kortz, K. M., & van der Hoeven Kraft, K. J. (2016). Geoscience Education Research Project: Student Benefits and Effective Design of a Course-Based Undergraduate Research Experience. *Journal of Geoscience Education*, 64(1), 24-36.
- [41] Kowalski, J. R., Hoops, G. C., & Johnson, R. J. (2016). Implementation of a collaborative series of classroom-based undergraduate research experiences spanning chemical biology, biochemistry, and neurobiology. *CBE—Life Sciences Education*, 15(4), ar55.
- [42] Lawrie, G. A., Grøndahl, L., Boman, S., & Andrews, T. (2016). Wiki laboratory notebooks: Supporting student learning in collaborative inquiry based laboratory experiments. *Journal of Science Education and Technology*, 25(3), 394-409.

- [43] Lipchock, J. M., Ginther, P. S., Douglas, B. B., Bird, K. E., & Patrick Loria, J. (2017). Exploring protein structure and dynamics through a project - oriented biochemistry laboratory module. *Biochemistry and Molecular Biology Education*, 45(5), 403-410.
- [44] Mader, C. M., Beck, C. W., Grillo, W. H., Hollowell, G. P., Hennington, B. S., Staub, N. L., ... & Bradford, C. (2017). Multi-Institutional, Multidisciplinary Study of the Impact of Course-Based Research Experiences. *Journal of microbiology & biology education*, 18(2).
- [45] Makarevitch, I., Frechette, C., & Wiatros, N. (2015). Authentic research experience and “big data” analysis in the classroom: maize response to abiotic stress. *CBE-Life Sciences Education*, 14(3), ar27.
- [46] McDermott, M. L. (2016). Lowering Barriers to Undergraduate Research through Collaboration with Local Craft Breweries. *Journal of Chemical Education*, 93(9), 1543-1548.
- [47] McDonough, J., Goudsouzian, L. K., Papaj, A., Maceli, A. R., Klepac - Ceraj, V., & Peterson, C. N. (2017). Stressing Escherichia coli to educate students about research: A CURE to investigate multiple levels of gene regulation. *Biochemistry and Molecular Biology Education*, 45(5), 449-458.
- [48] Moitra, K. (2017). Releasing the “GENI”: integrating authentic microbial genomics research into the classroom through GENI-ACT. *FEMS microbiology letters*, 364(21), fnx215.
- [49] Monge, D. (2015). Alkaloid-Derived Thioureas in Asymmetric Organocatalysis: A Cooperative Learning Activity in a Project-Based Laboratory Course. *Journal of Chemical Education*, 92(8), 1390-1393.
- [50] Peteroy-Kelly, M. A., Marcello, M. R., Crispo, E., Buraei, Z., Strahs, D., Isaacson, M., ... & Zuzga, D. (2017). Participation in a Year-Long CURE Embedded into Major Core Genetics and Cellular and Molecular Biology Laboratory Courses Results in Gains in Foundational Biological Concepts and Experimental Design Skills by Novice Undergraduate Researchers. *Journal of microbiology & biology education*, 18(1).
- [51] Pontrello, J. K. (2015). Bringing research into a first semester organic chemistry laboratory with the multistep synthesis of carbohydrate - based HIV inhibitor mimics. *Biochemistry and Molecular Biology Education*, 43(6), 417-427.
- [52] Pontrello, J. K. (2015). Metalloprotease peptide inhibitors: A semester-long organic synthetic research project for the introductory laboratory course. *Journal of Chemical Education*, 92(5), 811-818.
- [53] Rodenbusch, S. E., Hernandez, P. R., Simmons, S. L., & Dolan, E. L. (2016). Early engagement in course-based research increases graduation rates and completion of science, engineering, and mathematics degrees. *CBE-Life Sciences Education*, 15(2), ar20.

- [54] Russell, J. E., D'Costa, A. R., Runck, C., Barnes, D. W., Barrera, A. L., Hurst-Kennedy, J., ... & Haining, R. (2015). Bridging the undergraduate curriculum using an integrated course-embedded undergraduate research experience (ICURE). *CBE-Life Sciences Education*, 14(1), ar4.
- [55] Sangster, S. L., Loy, K. L., Mills, S. D., & Lawson, K. L. (2016). Engaging First-year University Students in Research: Promise, Potentials, and Pitfalls. *The Canadian Journal for the Scholarship of Teaching and Learning*, 7(1), 3.
- [56] Sarmah, S., Chism III, G. W., Vaughan, M. A., Muralidharan, P., Marrs, J. A., & Marrs, K. A. (2016). Using zebrafish to implement a course-based undergraduate research experience to study teratogenesis in two biology laboratory courses. *Zebrafish*, 13(4), 293-304.
- [57] Shaffer, C. D., Alvarez, C. J., Bednarski, A. E., Dunbar, D., Goodman, A. L., Reinke, C., ... & Bazinet, C. (2014). A course-based research experience: how benefits change with increased investment in instructional time. *CBE-Life Sciences Education*, 13(1), 111-130.
- [58] Shaner, S. E., Hooker, P. D., Nickel, A. M., Leichtfuss, A. R., Adams, C. S., de la Cerda, D., ... & Khaliqi, D. (2016). Discovering Inexpensive, Effective Catalysts for Solar Energy Conversion: An Authentic Research Laboratory Experience. *Journal of Chemical Education*, 93(4), 650-657.
- [59] Shanle, E. K., Tsun, I. K., & Strahl, B. D. (2016). A course-based undergraduate research experience investigating p300 bromodomain mutations. *Biochemistry and Molecular Biology Education*, 44(1), 68-74.
- [60] Spell, R. M., Guinan, J. A., Miller, K. R., & Beck, C. W. (2014). Redefining authentic research experiences in introductory biology laboratories and barriers to their implementation. *CBE-Life Sciences Education*, 13(1), 102-110.
- [61] Stanley, J. T., Dounas-Frazer, D. R., Kiepora, L., & Lewandowski, H. J. (2015). Investigating student ownership of projects in an upper-division physics lab course. *arXiv preprint arXiv:1507.03947*.
- [62] Staub, N. L., Poxleitner, M., Braley, A., Smith-Flores, H., Pribbenow, C. M., Jaworski, L., ... & Anders, K. R. (2016). Scaling Up: Adapting a Phage-Hunting Course to Increase Participation of First-Year Students in Research. *CBE-Life Sciences Education*, 15(2), ar13.
- [63] Swanson, H. I., Sarge, O. K. P., Rodrigo-Peirís, T., Xiang, L., & Cassone, V. M. (2016). Development of a course-based undergraduate research experience to introduce drug-receptor concepts. *Journal of Medical Education and Curricular Development*, 3, JMECD-S31233.
- [64] Tomasik, J. H., LeCaptain, D., Murphy, S., Martin, M., Knight, R. M., Harke, M. A., ... & Acevedo-Polakovich, I. D. (2014). Island Explorations: Discovering Effects of Environmental

Research-Based Lab Activities on Analytical Chemistry Students. *Journal of Chemical Education*, 91(11), 1887-1894.

[65] Villa-Cuesta, E., &Hobbie, L. (2016). Genetics Research Project Laboratory: A Discovery-Based Undergraduate Research Course. *Genetics Society of America Peer-Reviewed Education*. (GSA PREP): 2016.003.

[66] Wallin, P. (2017). The potential of complex challenges in undergraduate research to stimulate transformative learning. *Nordic Journal of STEM Education*, 1(1), 307-318.

[67] Wallin, P., Adawi, T., & Gold, J. (2016). Linking teaching and research in an undergraduate course and exploring student learning experiences. *European Journal of Engineering Education*, 1-17.

[68] Wang, J. T. (2016). Using undergraduate research to develop transferable skills for the modern workforce. *Microbiology Australia*, 37(2), 84-87.

[69] Ward, J. R., Clarke, H. D., & Horton, J. L. (2014). Effects of a research-infused botanical curriculum on undergraduates' content knowledge, STEM competencies, and attitudes toward plant sciences. *CBE-Life Sciences Education*, 13(3), 387-396.

[70] Wiley, E. A., & Stover, N. A. (2014). Immediate dissemination of student discoveries to a model organism database enhances classroom-based research experiences. *CBE—Life Sciences Education*, 13(1), 131-138.

[71] Wolkow, T. D., Durrenberger, L. T., Maynard, M. A., Harrall, K. K., & Hines, L. M. (2014). A comprehensive faculty, staff, and student training program enhances student perceptions of a course-based research experience at a two-year institution. *CBE—Life Sciences Education*, 13(4), 724-737.

[72] Zhou, Y., Jung, E., Arroyave, R., Radovic, M., &Shamberger, P. (2015). Incorporating Research Experiences into an Introductory Materials Science Course. *International Journal of Engineering Education*, 31(6).

URE papers:

[73] Adedokun, O. A., Parker, L. C., Childress, A., Burgess, W., Adams, R., Agnew, C. R., ... &Teegarden, D. (2014). Effect of time on perceived gains from an undergraduate research program. *CBE—Life Sciences Education*, 13(1), 139-148.

[74] Alford, R. F., Leaver-Fay, A., Gonzales, L., Dolan, E. L., & Gray, J. J. (2017). A cyber-linked undergraduate research experience in computational biomolecular structure prediction and design. *PLoS computational biology*, 13(12), e1005837.



- [75] Baiduc, R. R., Drane, D., Beitel, G. J., & Flores, L. C. (2017). A Research Preparatory Program for First-Year College Students: Student Selection and Preparation Lead to Persistence in Research. *Innovative Higher Education*, 42(3), 269-284.
- [76] Baum, B. S., Rowell, G. H., Green, L., Yantz, J., Beck, J., Cheatham, T., ... & Nelson, D. (2017). Team-based Introductory Research Experiences in Mathematics. *Problems, Resources, and Issues in Mathematics Undergraduate Studies*, 27(3), 389-405.
- [77] Bell, J.H., Thrun, L., LeBeau, M., Makarevitch, I., Goldberg, J., and Martin, P. (2016). Antibiotic Resistance Genes Detection in Environmental Samples. *CourseSource*. 3, 1-10.
- [78] Branch, S. E., Woodcock, A., & Graziano, W. G. (2015). Person orientation and encouragement: Predicting interest in engineering research. *Journal of Engineering Education*, 104(2), 119-138.
- [79] Brown, A. M., Lewis, S. N., & Bevan, D. R. (2016). Development of a structured undergraduate research experience: Framework and implications. *Biochemistry and Molecular Biology Education*, 44(5), 463-474.
- [80] Burgin, S. R., & Sadler, T. D. (2016). Learning nature of science concepts through a research apprenticeship program: A comparative study of three approaches. *Journal of Research in Science Teaching*, 53(1), 31-59.
- [81] Carpi, A., Ronan, D. M., Falconer, H. M., & Lents, N. H. (2017). Cultivating minority scientists: Undergraduate research increases self - efficacy and career ambitions for underrepresented students in STEM. *Journal of Research in Science Teaching*, 54(2), 169-194.
- [82] Carpinelli, J. D., Perna, A. J., & Hirsch, L. (2017) The Impact of an Undergraduate Research Program on Students' Attitudes toward and Pursuit of Graduate Studies—A Follow-up Study. *American Society for Engineering Education*. Paper ID #17787.
- [83] Collins, T. W., Grineski, S. E., Shenberger, J., Morales, X., Morera, O. F., & Echegoyen, L. E. (2017). Undergraduate Research Participation Is Associated With Improved Student Outcomes at a Hispanic-Serving Institution. *Journal of College Student Development*, 58(4), 583-600.
- [84] Crockett, E. T. (2014). A research education program model to prepare a highly qualified workforce in biomedical and health-related research and increase diversity. *BMC medical education*, 14(1), 202.
- [85] Cunningham, D. F., Wurie, A., Byfield, G. E., & Melton, M. A. (2015). Impact of STEM Capstone Undergraduate Research Courses at Saint Augustine's University. In *Infusing Undergraduate Research into Historically Black Colleges and Universities Curricula* (pp. 179-196). Emerald Group Publishing Limited.

- [86] Daniels, H., Grineski, S. E., Collins, T. W., Morales, D. X., Morera, O., & Echegoyen, L. (2016). Factors influencing student gains from undergraduate research experiences at a Hispanic-serving institution. *CBE—Life Sciences Education*, 15(3), ar30.
- [87] Davis, S. N., & Jones, R. M. (2017). Understanding the role of the mentor in developing research competency among undergraduate researchers. *Mentoring & Tutoring: Partnership in Learning*, 25(4), 455-465.
- [88] Davis, S. N., Mahatmya, D., Garner, P. W., & Jones, R. M. (2015). Mentoring Undergraduate Scholars: A Pathway to Interdisciplinary Research?. *Mentoring & Tutoring: Partnership in Learning*, 23(5), 427-440.
- [89] Economy, D. R., Sharp, J. L., Martin, J. P., & Kennedy, M. S. (2014). Factors associated with student decision-making for participation in the research experiences for undergraduates program. *International Journal of Engineering Education*, 30(6), 1395-1404.
- [90] Eosco, G. M., Tallapragada, M., McComas, K. A., & Brady, M. (2014). Exploring societal and ethical views of nanotechnology REUs. *Nanoethics*, 8(1), 91-99.
- [91] Fakayode, S. O., Yakubu, M., Adeyeye, O. M., Pollard, D. A., & Mohammed, A. K. (2014). Promoting Undergraduate STEM education at a historically black college and university through research experience. *Journal of Chemical Education*, 91(5), 662-665.
- [92] Fuchs, J., Kouyate, A., Kroboth, L., & McFarland, W. (2016). Growing the pipeline of diverse HIV investigators: the impact of mentored research experiences to engage underrepresented minority students. *AIDS and Behavior*, 20(2), 249-257.
- [93] Gardner, G. E., Ferzli, M., Jeffrey, P. S., & Shea, D. (2015). Undergraduate Research as an Innovative Learning Experience: Student Perspectives on Professional Impacts. *Innovations in College Science Teaching*, 35-48.
- [94] George, S. M., & Domire, Z. J. (2017). Simulations, Imaging, and Modeling: A Unique Theme for an Undergraduate Research Program in Biomechanics. *Journal of Biomechanical Engineering*, 139(7), 071002.
- [95] Ghee, M., Keels, M., Collins, D., Neal-Spence, C., & Baker, E. (2016). Fine-tuning summer research programs to promote underrepresented students' persistence in the STEM pathway. *CBE—Life Sciences Education*, 15(3), ar28.
- [96] Gilbert, B. L., Banks, J., Houser, J. H., Rhodes, S. J., & Lees, N. D. (2014). Student development in an experiential learning program. *Journal of College Student Development*, 55(7), 707-713.

- [97] Gilmore, J., Vieyra, M., Timmerman, B., Feldon, D., & Maher, M. (2015). The relationship between undergraduate research participation and subsequent research performance of early career STEM graduate students. *Journal of Higher Education*, 86(6), 834-863.
- [98] Goulooze, S. C., Franson, K. L., Cohen, A. F., & Rissmann, R. (2017). Clinical Pharmacology Research Internships at the Interface between Academia and Industry: Students' Perceptions and Scientific Output. *Basic & clinical pharmacology & toxicology*, 121(1), 22-28.
- [99] Graham, K. J., McIntee, E. J., Raigoza, A. F., Fazal, M. A., & Jakubowski, H. V. (2016). Activities in an S-STEM program to catalyze early entry into research. *Journal of Chemical Education*, 94(2), 177-182.
- [100] Griese, E. R., McMahon, T. R., & Kenyon, D. B. (2017). A research experience for American Indian undergraduates: Utilizing an actor-partner interdependence model to examine the student-mentor dyad. *Journal of diversity in higher education*, 10(1), 39.
- [101] Griffeth, N., Batista, N., Grosso, T., Arianna, G., Bhatia, R., Boukerche, F., ... & Krynski, K. (2016). An Undergraduate Research Experience Studying Ras and Ras Mutants. *IEEE Transactions on Education*, 59(2), 91-97.
- [102] Haeger, H., & Fresquez, C. (2016). Mentoring for inclusion: the impact of mentoring on undergraduate researchers in the sciences. *CBE—Life Sciences Education*, 15(3), ar36.
- [103] Harrington, M. A., Smolinski, T. G., Lloyd, A., & Shahin, M. (2015). Undergraduate Research Programs Can Also Be Faculty Development Programs. In *Infusing Undergraduate Research into Historically Black Colleges and Universities Curricula* (pp. 115-127). Emerald Group Publishing Limited.
- [104] Harsh, J., Esteb, J. J., & Maltese, A. V. (2017). Evaluating the development of chemistry undergraduate researchers' scientific thinking skills using performance-data: First findings from the performance assessment of undergraduate research (PURE) instrument. *Chemistry Education Research and Practice*, 18(3), 472-485.
- [105] Holmes, N. G., & Wieman, C. E. (2016). Examining and contrasting the cognitive activities engaged in undergraduate research experiences and lab courses. *Physical Review Physics Education Research*, 12(2), 020103.
- [106] Hu, Q., Li, F., & Chen, C. F. (2015). A smart home test bed for undergraduate education to bridge the curriculum gap from traditional power systems to modernized smart grids. *IEEE Transactions on Education*, 58(1), 32-38.
- [107] Kain, V. J., Hepworth, J., Bogossian, F., & McTaggart, L. (2014). Inside the research incubator: A case study of an intensive undergraduate research experience for nursing & midwifery students. *Collegian*, 21(3), 217-223.

- [108] Kapon, S. (2016). Doing research in school: Physics inquiry in the zone of proximal development. *Journal of Research in Science Teaching*, 53(8), 1172-1197.
- [109] Katz, L. A., Aloisio, K. M., Horton, N. J., Ly, M., Pruss, S., Queeney, K., ... & DiBartolo, P. M. (2017). A program aimed toward inclusive excellence for underrepresented undergraduate women in the sciences. *CBE—Life Sciences Education*, 16(1), ar11.
- [110] Kelsey, E., Briedé, C. M., O'Brien, K., Padham, T., Cann, M., Davis, L., & Carne, A. (2015). Blown Away: Interns Experience Science, Research, and Life on Top of Mount Washington. *Bulletin of the American Meteorological Society*, 96(9), 1533- 1543.
- [111] Kolber, B. J., Janjic, J. M., Pollock, J. A., & Tidgewell, K. J. (2016). Summer undergraduate research: A new pipeline for pain clinical practice and research. *BMC medical education*, 16(1), 135.
- [112] Kuehn, G. D. (2016). Impact of Summer Undergraduate Research Experiences on Baccalaureate Success by American Indian Students. In *The Power and Promise of Early Research* (pp. 153-184). American Chemical Society.
- [113] Mabrouk, P. A. (2015). What Knowledge of Responsible Conduct of Research Do Undergraduates Bring to Their Undergraduate Research Experiences?. *Journal of Chemical Education*, 93(1), 46-55.
- [114] Maton, K. I., Beason, T. S., Godsay, S., Sto. Domingo, M. R., Bailey, T. C., Sun, S., & Hrabowski III, F. A. (2016). Outcomes and processes in the Meyerhoff scholars program: STEM PhD completion, sense of community, perceived program benefit, science identity, and research self-efficacy. *CBE—Life Sciences Education*, 15(3), ar48.
- [115] Mercader-Trejo, F., López, A. R., Granada, G. L., Hernández, L. N., & Basurto, R. H. (2016). Technical internships as a means of acquiring professional skills for future metrologists. *Measurement*, 84, 1-6.
- [116] Nadelson, L. S., Warner, D., & Brown, E. (2015). Life's lessons in the lab: A summer of learning from undergraduate research experiences. *Journal of STEM Education: Innovations and Research*, 16(3), 5-12.
- [117] Owerbach, D., & Oyekan, A. (2015). Undergraduate research experience aids progression, graduation rates at Texas Southern University, an HBCU. *Council on Undergraduate Research Quarterly*, 36(2), 28-32.
- [118] Peteet, B. J., & Lige, Q. (2016). Beyond a bachelor's: Implementing a graduate school preparation program. *Journal of Black Studies*, 47(2), 95-112.
- [119] Ping, W. (2015). Dental undergraduate students' participation in research in China: current state and directions. *European Journal of Dental Education*, 19(3), 177-184.

[120] Piunno, P. A., Boyd, C., Barzda, V., Gradinaru, C. C., Krull, U. J., Stefanovic, S., & Stewart, B. (2014). The advanced interdisciplinary research laboratory: a student team approach to the fourth-year research thesis project experience. *Journal of Chemical Education*, 91(5), 655-661.

[121] Porter, L. A. (2017). High-Impact Practices in Materials Science Education: Student Research Internships Leading to Pedagogical Innovation in STEM Laboratory Learning Activities. *MRS Advances*, 2(31-32), 1667-1672.

[122] Raman, D. R., Geisinger, B. N., Kemis, M. R., & de la Mora, A. (2016). Key actions of successful summer research mentors. *Higher Education*, 72, 363-379.

[123] Robnett, R. D., Chemers, M. M., & Zurbriggen, E. L. (2015). Longitudinal associations among undergraduates' research experience, self - efficacy, and identity. *Journal of Research in Science Teaching*, 52(6), 847-867.

[124] Rosenzweig, J. A., Vrinceanu, D., Hwang, H. M., & Shishodia, S. (2016). Vertical Alignment of Educational Opportunities for STEM Learners: Evaluating the Effects of Road Dust on Biological Systems. *The American Biology Teacher*, 78(9), 710-716.

[125] Rowland, S., Pedwell, R., Lawrie, G., & Worthy, P. (2016). Developing and resourcing academics to help students conduct and communicate undergraduate research on a large scale. *Australian Government Office for Learning and Teaching*. Final Report 2016.

[126] Salto, L. M., Riggs, M. L., De Leon, D. D., Casiano, C. A., & De Leon, M. (2014). Underrepresented minority high school and college students report STEM-pipeline sustaining gains after participating in the Loma Linda University summer health disparities research program. *PloS one*, 9(9), e108497.

[127] Sens, D. A., Cisek, K. L., Garrett, S. H., Somji, S., Dunlevy, J. R., Sens, M. A., ... & Doze, V. A. (2017). STEERing an IDeA in Undergraduate Research at a Rural Research Intensive University. *Academic pathology*, 4, 2374289517735092.

[128] Shreiber, D. I., Moghe, P. V., & Roth, C. M. (2015). Multidisciplinary" Boot Camp" Training in Cellular Bioengineering to Accelerate Research Immersion for REU Participants. *Advances in Engineering Education*, 4(4), n4.

[129] Simas Filho, E. F., Pena, F. L., de Albuquerque, M. C., Farias, P. C., & Reis, M. (2016). Hands-on activities in experimental high-energy physics for attraction and motivation to engineering careers. *International Journal of Electrical Engineering Education*, 53(1), 72-86.

[130] Stanford, J. S., Rocheleau, S. E., Smith, K. P., & Mohan, J. (2017). Early undergraduate research experiences lead to similar learning gains for STEM and Non-STEM undergraduates. *Studies in Higher Education*, 42(1), 115-129.

- [131] Stephens, A. L., Pallant, A., & McIntyre, C. (2016). Telepresence-enabled remote fieldwork: Undergraduate research in the deep sea. *International Journal of Science Education*, 38(13), 2096-2113.
- [132] Sturmer, K. K., Bishop, P., & Lenhart, S. M. (2017). Developing Collaboration Skills in Team Undergraduate Research Experiences. *Problems, Resources, and Issues in Mathematics Undergraduate Studies*, 27(3), 370-388.
- [133] Thompson, J. J., Conaway, E., & Dolan, E. L. (2016). Undergraduate students' development of social, cultural, and human capital in a networked research experience. *Cultural Studies of Science Education*, 11(4), 959-990.
- [134] VanMeter-Adams, A., Frankenfeld, C. L., Bases, J., Espina, V., & Liotta, L. A. (2014). Students who demonstrate strong talent and interest in STEM are initially attracted to STEM through extracurricular experiences. *CBE—Life Sciences Education*, 13(4), 687-697.
- [135] Waratuke, S., & Kling, T. (2016). Interdisciplinary Research in a Dense Summer Bridge: The Role of a Writing Intensive Chemistry Seminar. *Journal of Chemical Education*, 93(8), 1391-1396.
- [136] Woodzicka, J. A., Ford, T. E., Caudill, A., & Ohanmamooreni, A. (2015). A Successful Model of Collaborative Undergraduate Research A Multi-Faculty, Multi-Project, Multi-Institution Team Approach. *Teaching of Psychology*, 42(1), 60-63.
- [137] Yaffe, K., Bender, C., & Sechrest, L. (2014). How does undergraduate research experience impact career trajectories and level of career satisfaction: A comparative survey. *Journal of College Science Teaching*, 44(1), 25-33.

TRE papers:

- [138] Amolins, M. W., Ezrailson, C. M., Pearce, D. A., Elliott, A. J., & Vitiello, P. F. (2015). Evaluating the effectiveness of a laboratory-based professional development program for science educators. *Advances in physiology education*, 39(4), 341-351.
- [139] Anderson, D., & Moeed, A. (2017). Working Alongside Scientists. *Science & Education*, 26(3-4), 271-298.
- [140] Autenrieth, R. L., Lewis, C. W., & Butler-Purry, K. L. (2017). Long-Term Impact of the Enrichment Experiences in Engineering (E<sup>3</sup>) Summer Teacher Program. *Journal of STEM Education: Innovations and Research*, 18(1), 25.

- [141] Bahbah, S., Golden, B. W., Roseler, K., Elderle, P., Saka, Y., & Shoutherland, S. A. (2013). The Influence of RET's on Elementary and Secondary Grade Teachers' Views of Scientific Inquiry. *International Education Studies*, 6(1), 117-131.
- [142] Blanchard, M. R., & Sampson, V. D. (2017). Fostering Impactful Research Experiences for Teachers (RETs). *Eurasia Journal of Mathematics, Science and Technology Education*, 14(1), 447-465.
- [143] Blanchard, M. R., Southerland, S. A., & Granger, E. M. (2009). No silver bullet for inquiry: Making sense of teacher change following an inquiry - based research experience for teachers. *Science Education*, 93(2), 322-360.
- [144] Brown, S., & Melear, C. (2007). Preservice teachers' research experiences in scientists' laboratories. *Journal of Science Teacher Education*, 18(4), 573-597.
- [145] Boesdorfer, S. B., & Asprey, L. M. (2017). Exploratory Study of the Teaching Practices of Novice Science Teachers Who Participated in Undergraduate Science Education Research. *Electronic Journal of Science Education*, 21(3).
- [146] Burrows, A. C., Breiner, J. M., Keiner, J., & Behm, C. (2014). Biodiesel and integrated STEM: Vertical alignment of high school biology/biochemistry and chemistry. *Journal of Chemical Education*, 91(9), 1379-1389.
- [147] Buxner, S. R. (2014). Exploring How Research Experiences for Teachers Changes Their Understandings of the Nature of Science and Scientific Inquiry. *Journal of Astronomy & Earth Sciences Education*, 1(1), 53-68.
- [148] DeJong, B. P. (2016). An Engineering Research Program for High School Science Teachers: Year Two Changes and Results. *Journal of STEM Education: Innovations and Research*, 17(1).
- [149] Dixon, P., & Wilke, R. A. (2007). The influence of a teacher research experience on elementary teachers' thinking and instruction. *Journal of elementary science education*, 19(1), 25-43.
- [150] Dresner, M. (2008). Using research projects and qualitative conceptual modeling to increase novice scientists' understanding of ecological complexity. *Ecological Complexity*, 5(3), 216-221.
- [151] Enderle, P., Dentzau, M., Roseler, K., Southerland, S., Granger, E., Hughes, R., ... & Saka, Y. (2014). Examining the influence of RETs on science teacher beliefs and practice. *Science Education*, 98(6), 1077-1108.

- [152] Faber, C., Hardin, E., Klein-Gardner, S., & Benson, L. (2014). Development of teachers as scientists in research experiences for teachers programs. *Journal of Science Teacher Education*, 25(7), 785-806.
- [153] Feldman, A., Divoll, K., & Rogan - Klyve, A. (2009). Research education of new scientists: Implications for science teacher education. *Journal of Research in Science Teaching: The Official Journal of the National Association for Research in Science Teaching*, 46(4), 442-459.
- [154] Grove, C. M., Dixon, P. J., & Pop, M. M. (2009). Research experiences for teachers: Influences related to expectancy and value of changes to practice in the American classroom. *Professional development in education*, 35(2), 247-260.
- [155] Hanegan, N., Friden, K., & Nelson, C. R. (2009). Authentic and simulated professional development: Teachers reflect what is modeled. *School science and mathematics*, 109(2), 79-94.
- [156] Hardré, P. L., Ling, C., Shehab, R. L., Nanny, M. A., Nollert, M. U., Refai, H., ... & Huang, S. M. (2017). Situating teachers' developmental engineering experiences in an inquiry-based, laboratory learning environment. *Teacher Development*, 21(2), 243-268.
- [157] Hardré, P. L., Nanny, M., Refai, H., Ling, C., & Slater, J. (2010). Engineering a dynamic science learning environment for K-12 teachers. *Teacher Education Quarterly*, 37(2), 157-178.
- [158] Herrington, D. G., Bancroft, S. F., Edwards, M. M., & Schairer, C. J. (2016). I want to be the inquiry guy! How research experiences for teachers change beliefs, attitudes, and values about teaching science as inquiry. *Journal of Science Teacher Education*, 27(2), 183-204.
- [159] Herrington, D. G., Luxford, K., & Yezierski, E. J. (2012). Target inquiry: Helping teachers use a research experience to transform their teaching practices. *Journal of Chemical Education*, 89(4), 442-448.
- [160] Herrington, D. G., Yezierski, E. J., Luxford, K. M., & Luxford, C. J. (2011). Target inquiry: Changing chemistry high school teachers' classroom practices and knowledge and beliefs about inquiry instruction. *Chemistry Education Research and Practice*, 12(1), 74-84.
- [161] Hess, J. L., Feldhaus, C., & Agarwal, M. (2017, June). Board# 51: An Evaluation of a Research Experience Traineeship (RET) Program for Integrating Nanotechnology into Pre-College Curriculum. In *2017 ASEE Annual Conference & Exposition*.
- [162] Holbert, K. E., Grable, L. L., Overbay, A., & Nzekwe, B. J. (2014). FREEDM precollege programs: Inspiring generation Y to pursue careers in the electric power industry. *IEEE Transactions on Power Systems*, 29(4), 1888-1895.



- [163] Hughes, R., Molyneaux, K., & Dixon, P. (2012). The role of scientist mentors on teachers' perceptions of the community of science during a summer research experience. *Research in Science Education*, 42(5), 915-941.
- [164] Kerlin, S. (2012). Professional development strategies that promote science inquiry teaching and learning. *Kentucky Journal of Excellence in College Teaching and Learning*, 10(2012), 6.
- [165] Kimmel, H., Hirsch, L. S., Simon, L., Burr-Alexander, L., & Dave, R. (2009). Implementing Concepts of Pharmaceutical Engineering into High School Science Classrooms. *Chemical Engineering Education*, 43(3), 187-193.
- [166] Klein-Gardner, S. S., Johnston, M. E., & Benson, L. (2012). Impact of RET teacher-developed curriculum units on classroom experiences for teachers and students. *Journal of Pre-College Engineering Education Research (J-PEER)*, 2(2), 4.
- [167] Kukreti, A. R., Wei, H., Soled, S. W., Mcnerney, P., & Dean-Mann, V. (2011). Applying Research Experience into Classroom Teaching: Case Study of Transportation Project in RET Site. In *ICCTP 2011: Towards Sustainable Transportation Systems* (pp. 4031-4042).
- [168] Laffey, E. H., Cook-Chennault, K., & Hirsch, L. S. (2013). Rutgers University Research Experience for Teachers in Engineering: Preliminary Findings. *American Journal of Engineering Education*, 4(1), 13-26.
- [169] Luera, G., & Murray, K. (2016). A Mixed Methods Approach to Determining the Impact of a Geoscience Field Research Program Upon Science Teachers' Knowledge, Beliefs, and Instructional Practices. *Journal of Geoscience Education*, 64(4), 303-313.
- [170] McLaughlin, C. A., & MacFadden, B. J. (2014). At the elbows of scientists: Shaping science teachers' conceptions and enactment of inquiry-based instruction. *Research in Science Education*, 44(6), 927-947.
- [171] Miranda, R. J., & Damico, J. B. (2015). Changes in Teachers' Beliefs and Classroom Practices Concerning Inquiry-Based Instruction Following a Year-Long RET-PLC Program. *Science Educator*, 24(1), 23.
- [172] Miranda, R. J., & Damico, J. B. (2013). Science teachers' beliefs about the influence of their summer research experiences on their pedagogical practices. *Journal of Science Teacher Education*, 24(8), 1241-1261.
- [173] Munn, M., Knuth, R., Van Horne, K., Shouse, A. W., & Levias, S. (2017). How Do You Like Your Science, Wet or Dry? How Two Lab Experiences Influence Student Understanding of Science Concepts and Perceptions of Authentic Scientific Practice. *CBE—Life Sciences Education*, 16(2), ar39.

- [174] Peters-Burton, E. E., Merz, S. A., Ramirez, E. M., & Saroughi, M. (2015). The effect of cognitive apprenticeship-based professional development on teacher self-efficacy of science teaching, motivation, knowledge calibration, and perceptions of inquiry-based teaching. *Journal of Science Teacher Education*, 26(6), 525-548.
- [175] Pop, M. M., Dixon, P., & Grove, C. M. (2010). Research experiences for teachers (RET): Motivation, expectations, and changes to teaching practices due to professional program involvement. *Journal of Science Teacher Education*, 21(2), 127-147.
- [176] Ragusa, G., & Juarez, C. (2017, June). Board# 121: A Seven-Year Study of Middle and High School Teachers Participating in Research Experiences For Teachers Programs: Exploring the Relationship Between Teacher Performance and Student Achievement. In *2017 ASEE Annual Conference & Exposition*.
- [177] Reynolds, D., Yazdani, N., & Manzur, T. (2013). STEM High School Teaching Enhancement Through Collaborative Engineering Research on Extreme Winds. *Journal of STEM Education: Innovations & Research*, 14(1).
- [178] Rivera, M. A. J., Manning, M. M., & Krupp, D. A. (2013). A Unique Marine and Environmental Science Program for High School Teachers in Hawai'i: Professional Development, Teacher Confidence, and Lessons Learned. *International Journal of Environmental and Science Education*, 8(2), 217-239.
- [179] Saka, Y. (2013). Who are the science teachers that seek professional development in research experience for teachers (RET's)? Implications for teacher professional development. *Journal of Science Education and Technology*, 22(6), 934-951.
- [180] Silverstein, S. C., Dubner, J., Miller, J., Glied, S., & Loike, J. D. (2009). Teachers' participation in research programs improves their students' achievement in science. *Science*, 326(5951), 440-442.
- [181] Southerland, S. A., Granger, E. M., Hughes, R., Enderle, P., Ke, F., Roseler, K., ... & Tekkumru-Kisa, M. (2016). Essential Aspects of Science Teacher Professional Development: Making Research Participation Instructionally Effective. *AERA Open*, 2(4), 2332858416674200.
- [182] Yelamarthi, K., DeJong, B. P., Kaya, T., Abdelgawad, A., & Shabib, I. (2017, June). Board# 31: Research Experiences for School Teachers and Community College Instructors in Smart-Vehicles: Initial Implementation and Assessment. In *2017 ASEE Annual Conference & Exposition*.
- [183] Yelamarthi, K., Kaya, T., DeJong, B., Chen, D., Hu, Q., & Cheng, F. (2013). An engineering research program for high school science teachers: Feedback and lessons learned from the pilot implementation. *The Technology Interface International Journal*, 13(2), 46-60.

Combo papers:

[184] Ahmed, S., Sclafani, A., Aquino, E., Kala, S., Barias, L., & Eeg, J. (2017). Building student capacity to lead sustainability transitions in the food system through farm-based authentic research modules in sustainability sciences (FARMS). *Elementa-Science of the Anthropocene*, 5(46), 1-17.

[185] Awong-Taylor, J., D'Costa, A., Giles, G., Leader, T., Pursell, D., Runck, C., & Mundie, T. (2016). Undergraduate Research for All: Addressing the Elephant in the Room. *Council on Undergraduate Research Quarterly*, 37(1).

[186] Bowman, N. A., & Holmes, J. M. (2018). Getting off to a good start? First-year undergraduate research experiences and student outcomes. *Higher Education*, 76(1), 17-33.

[187] Carbone, E. T., & Ware, S. (2017). Are College Graduates Ready for the 21st Century? Community-Engaged Research Can Help. *Journal of Higher Education Outreach and Engagement*, 21(4), 173-207.

[188] Frantz, K. J., Demetrikopoulos, M. K., Britner, S. L., Carruth, L. L., Williams, B. A., Pecore, J. L., ... & Goode, C. T. (2017). A comparison of internal dispositions and career trajectories after collaborative versus apprenticed research experiences for undergraduates. *CBE—Life Sciences Education*, 16(1), ar1.

[189] Hotaling, S., Slabach, B. L., & Weisrock, D. W. (2018). Next-generation teaching: a template for bringing genomic and bioinformatic tools into the classroom. *Journal of Biological Education*, 52(3), 301-313.

[190] Salzman, N., & Ubic, R. (2017, April). Development and Assessment of a Combined REU/RET Program in Materials Science. In *ASEE Annual Conference and Exposition, Conference Proceedings*.

[191] Salzman, N., Nadelson, L., & Ubic, R. (2016). Implementing and Assessing a Joint REU/RET Program in Materials Science. In *ASEE Annual Conference and Exposition, Conference Proceedings*.

[192] Shapiro, C., Moberg-Parker, J., Toma, S., Ayon, C., Zimmerman, H., Roth-Johnson, E. A., ... & Sanders, E. R. (2015). Comparing the impact of course-based and apprentice-based research experiences in a life science laboratory curriculum. *Journal of microbiology & biology education*, 16(2), 186.

Other papers:

- [193] Cusick, A., Camer, D., Stamenkovic, A., & Zaccagnini, M. (2015). Peer Assisted Study Sessions for Research Trainees. *Journal of Peer Learning*, 8(4), 18-33.
- [194] Dasgupta, A. P., Anderson, T. R., & Pelaez, N. (2014). Development and validation of a rubric for diagnosing students' experimental design knowledge and difficulties. *CBE—Life Sciences Education*, 13(2), 265-284.
- [195] Davis, S. N., Jacobsen, S. K., & Ryan, M. (2015). Gender, race, and inequality in higher education: An intersectional analysis of faculty-student undergraduate research pairs at a diverse university. *Race, Gender & Class*, 22(3), 7-30.
- [196] Garcia-Garcia, M. J., Ayuga-Tellez, E., Gonzalez-Garcia, C., & Grande-Ortíz, M. A. (2014). Integration of Teaching Activities for Training in Research Skills in Technical University of Madrid. *International Journal of Engineering Education*, 30(6), 1613-1620.
- [197] Gray, K. E., Webb, D. C., & Otero, V. K. (2016). Effects of the learning assistant model on teacher practice. *Physical Review Physics Education Research*, 12(2), 020126.
- [198] Lewis, S. E. (2014). Investigating the longitudinal impact of a successful reform in general chemistry on student enrollment and academic performance. *Journal of Chemical Education*, 91(12), 2037-2044.
- [199] Linenberger, K., Slade, M. C., Addis, E. A., Elliott, E. R., Mynhardt, G., & Raker, J. R. (2014). Training the foot soldiers of inquiry: Development and evaluation of a graduate teaching assistant learning community. *Journal of College Science Teaching*, 44(1), 97-107.
- [200] Remich, R., Naffziger-Hirsch, M. E., Gazley, J. L., & McGee, R. (2016). Scientific growth and identity development during a postbaccalaureate program: Results from a multisite qualitative study. *CBE—Life Sciences Education*, 15(3), ar25.
- [201] Ro, H. K., & Loya, K. I. (2015). The effect of gender and race intersectionality on student learning outcomes in engineering. *The Review of Higher Education*, 38(3), 359-396.

# Secure\_Coding Google Form\_Lit Review\_April 2017

General Instructions:

Welcome, CARET collaborators!

This Google Form is designed to be used in combination with the "Secure\_Written Coding Guide\_Lit Review\_March 2017" on Google Drive. Open up that document to refer to while coding papers.

\*\*\*\*\*

## FIRST STEP:

Please access the full version of each paper you've been assigned. If you do not have access to one of the papers on your list, send an email to [LalehCote@berkeley.edu](mailto:LalehCote@berkeley.edu) with the APA citation of the paper you need. She will send you back a PDF version of the paper.

## SECOND STEP:

If you begin reading a paper, and you believe: a) that it cannot be coded because it does not describe TRE, URE, or CURE programs, or b) some other reason, please send an email to [LalehCote@berkeley.edu](mailto:LalehCote@berkeley.edu) with the APA citation of the paper in question. You'll be assigned a different paper.

## THIRD STEP:

Please fill out a separate Google Form for each paper you read and code. And, please, please, please, make sure to SUBMIT the form after you've entered in your codes! If an item has multiple codes, use commas to separate but there should be no spaces in between. For anything that you're not entirely sure about while coding, please do make a note about this in the "Notes, questions, comments" item at the end of the Google Form.

If you have previously coded a paper using the spreadsheet, you will need to add in your codes using the new Google Form, as there have been significant changes made between December 2016 and March 2017. You may use the codes from the spreadsheet to remind you of your original responses, but please do use the current codes as defined by this Written Coding Guide.

Yes, it is possible to make changes to codes after a form is submitted, but in order to reduce human error, we are encouraging people not to make changes directly on the "live" coding spreadsheet. Ideally, we

want all coding to be done through the Google Form. You can make edits to your Google Form if you make an error, or want to change a code - this can be done from the email you receive after submitting the form.

Note: This is to reduce the possibility that someone will alter something incorrectly on the spreadsheet. Once we have many papers coded, it will be very challenging to notice if a single change on the spreadsheet has been made.

If there is a paper that we feel will be especially useful to the work of the CARET collaboration (these papers will be given an A-rating on item #23 (Potential for informing CARET evaluation efforts), we may have multiple people code that paper. Or, if you are having a challenging time coding a particular paper, please make a note about this issue on item # 24 (Notes, questions, comments), and we can have an additional person read and code that paper.

The goal is not for everyone to code every paper. The goal is for every useful paper to be coded in a way that's most productive for the CARET collaboration.

Questions? Problems? Contact the Lit Review Working Group, so we can help!

\* Required

Email address \*

Your email

Paper: Enter in the APA citation below

Your answer

Item 1: Year Published (One code only)

2007

2008

2009

2010

2011

2012

2013

2014

2015

2016

2017

## Item 2: Initials of Coder (One code only)

Your answer

## Item 3: Program Type (Multiple codes allowed)

TRE

URE

CURE

Other:

## Item 4: Study Type (One code only)

1 = Empirical study

2 = Program description only

3 = Theoretical

4 = Review

5 = Instrument development

6 = Program Evaluation

Other:

## Item 5: Study Design (One code only)

0 = Not empirical

1 = One data point (pre only or post only)

2 = Pre- and Post-measure

3 = Trajectory; retrospective; multiple data points over time

4 = Comp. of 2(+) sample conditions (quasi-experimental)

5 = Longitudinal (tracking individuals over time)

Other:

### Item 6: More Than Self Report? (One code only)

Yes

No

### Item 7: Study Methods (Multiple codes allowed)

1 = Institutional Data/extrinsic measures survey

2a = Quantitative Self report survey (participants)

2b = Qualitative Self report survey (participants)

3a = Quantitative Self report survey (faculty/mentor)

3b = Qualitative Self report survey (faculty/mentor)

4 = Interviews/focus groups

5 = Content/practice assessment

Other:

### Item 8A: Learning Theory (Multiple codes allowed)

0 = No explicitly stated framework

1 = Constructivist

2 = Transmission

3 = Sociocultural



4 = Cognitive Apprenticeship (includes Community of Practice, Situated Practice)

5 = Transformational

Other:

### Item 8B: Conceptual Framework (One code only)

Your answer

### Item 8C: Theoretical Framework (One code only)

Your answer

### Item 9: Program Design Features (Multiple codes allowed)

0 = No program design features described

1 = Mentor engagement (or “engaged mentoring”), including Interaction with faculty/researcher; Interaction with post-doc/grad student/UG; Mentor training; Regular/scheduled mentor-mentee meetings; Mentor-mentee “contract” for setting expectations

2 = Project Ownership: Student-generated hypothesis/research question

3 = Project Ownership: Student-generated experimental design

4 = Community activity, including Regular research group meetings (peers and/or lab group); Regular seminar or brown bag; Attend conference/symposium; Collaboration on research with peers

5 = Reflection/Metacognition, including NOS reflection

6 = Scientific communication, including Presented a poster or talk; Wrote a summary paper; Contributed to peer-reviewed publication

7 = K-12 Classroom Curricula and Practices, including Curriculum Development; Translate to teaching practice reflection

Other:

### Item 10: TRE, URE, CURE Research Participants (Multiple codes allowed)

- 0 = Undergrad, not stated
- 1 = Community College/Technical College Students
- 2 = Lower Division Undergrads (4-Year Univ)
- 3 = Upper Division Undergrads (4-Year Univ)
- 4 = Both Lower & Upper Undergrads (4-Year Univ)
- 5 = Teacher candidates
- 6 = In-service Teachers
- 7 = Grad Students/Postdocs
- 8 = Higher Education Faculty
- Other:

### Item 11: Institutional Research Environment (Multiple codes allowed)

- 0 = 4 Year University - not stated
- 1 = 4 Year University - PhD granting
- 2 = 4 Year University or College - Undergrad-focused
- 3 = HBCU/HSI/Tribal College
- 4 = Community College/Technical College
- 5 = National Lab
- 6 = Non-Profit Research Org
- 7 = Industry
- Other:

### Item 12: Duration Participants Conduct Research (One code only)

- 0 = Unclear
- 1 = < 1 term
- 2 = 1 term (e.g., full semester, full summer)

3 = 1 year or 2 terms

4 = > 1 year

Other:

### Item 13: Intensity (One code only)

0 = Not stated

1 = Low intensity (< 10 hrs/week)

2 = High intensity (10+ hrs/week)

3 = Both low and high intensity (mixed)

Other:

### Item 14: Research Timing (One code only)

0 = Not stated

1 = Summer

2 = Academic year

3 = Both

Other:

### Item 15: Participants (N) (One code only)

Your answer

### Item 16: Study Subjects - Who were data collected from? (Multiple codes allowed)

0 = Undergrad, not stated

1 = Community College/Technical College Students

2 = Lower Division Undergrads (4-Year Univ)

3 = Upper Division Undergrads (4-Year Univ)

4 = Both Lower & Upper Undergrads (4-Year Univ)

- 5 = Teacher candidates
- 6 = In-service Teachers
- 7 = Grad Students/Postdocs
- 8 = Higher Education Faculty
- Other:

### Item 17: Study Demographics (One code only)

- 1 = Study focused specifically on Underrepresented Groups
- 2 = Study includes analysis of larger group (and identifies # of underrepresented group)
- 3 = Underrepresented Groups not described in analysis

### Item 18: Reported Outcome Measure/s (Multiple codes allowed)

- 0 = Not stated
- 1 = Performance (e.g., course grade, GPA)
- 2 = Disciplinary Content knowledge
- 3 = NOS
- 4 = Persistence in STEM pathways
- 5 = Science practices
- 6 = Lab Skills
- 7 = 21st Century skills
- 8 = Self-efficacy
- 9 = Confidence
- 10 = STEM career attitudes & interest (includes education pathways - choices & intentions)
- 11 = Teacher identity
- 12 = Scientist identity
- 13 = Improvement of classroom practice
- 14 = K-12 student learning outcomes
- 15 = Perceptions of teachers/teaching profession

16 = Awareness of STEM careers

17 = Leadership

Other:

### Item 19: Primary/Significant Reported Outcome Measure (One code only)

0 = Not stated

1 = Performance (e.g., course grade, GPA)

2 = Disciplinary Content knowledge

3 = NOS

4 = Persistence in STEM pathways

5 = Science practices

6 = Lab Skills

7 = 21st Century skills

8 = Self-efficacy

9 = Confidence

10 = STEM career attitudes & interest (includes education pathways - choices & intentions)

11 = Teacher identity

12 = Scientist identity

13 = Improvement of classroom practice

14 = K-12 student learning outcomes

15 = Perceptions of teachers/teaching profession

16 = Awareness of STEM careers

17 = Leadership

Other:

### Item 20: Content Area (Multiple codes allowed)

1 = Life Science

2 = Physical Science

3 = Earth/Space Science

4 = Engineering

5 = Mathematics

6 = Computer Science

7 = Interdisciplinary STEM fields

Other:

Item 21: Summary of Findings - Please describe the main findings that you felt were most important from this paper, and feel free to connect these findings to a certain type of program or group. (One code in paragraph format)

Your answer

Item 22: Implications - How might the findings of this study be used in practice, in a TRE, URE, or CURE? Or, what changes does this paper suggest be made in the future, and why? (One code in paragraph format)

Your answer

Item 23: Potential for informing CARET evaluation efforts (One code only)

A = High

B = Medium

C = Low

D = No potential

Item 24: Notes, questions, comments - Add in any notes or comments that you would want the CARET group to be aware of, any questions you had when reading the paper, and comment on your reasons for giving the paper a particular score in the last item, "Potential for informing CARET evaluation efforts". (One code in paragraph format)

Your answer

Item 25: Date coding was completed (One code only)

Date

Feedback about this Google Form or our Literature Review efforts

Your answer

A copy of your responses will be emailed to the address you provided.
